# Supplementary material for: An ion imprinted magnetic organosilica nanocomposite for the selective determination of traces of Cd(ii) in a minicolumn flow-through preconcentration system coupled with graphite furnace atomic absorption spectroscopy
Source: Royal Society of Chemistry journal article supplement (doi:10.1039/d2ay00804a), 2022-01-01
Supplement: d2ay00804a1.pdf [file d2ay00804a1.pdf]

## Electronic Supplementary Information

### Ion imprinted magnetic organosilica nanocomposite for the selective determination of traces of Cd (II) in a minicolumn flow-through preconcentration system coupled to graphite furnace atomic adsorption spectroscopy.

Yanina Minaberry<sup>a\*</sup>, Cecilia Costa<sup>b</sup>, Virginia Diz<sup>b</sup> and Mabel Tudino<sup>a</sup>

<sup>a</sup> Laboratorio de Trazas, DQIAQF, Facultad de Ciencias Exactas y Naturales, Universidad de Buenos Aires, Ciudad Universitaria Pab. II, C1428EHA, Buenos Aires, Argentina.

<sup>b</sup> DQIAQF, Facultad de Ciencias Exactas y Naturales, Universidad de Buenos Aires, Ciudad Universitaria Pab. II, C1428EHA, Buenos Aires, Argentina.

\*Corresponding author: E-mail: yanina.s.minaberry@gmail.com Tel.: +54 11 4576 3360

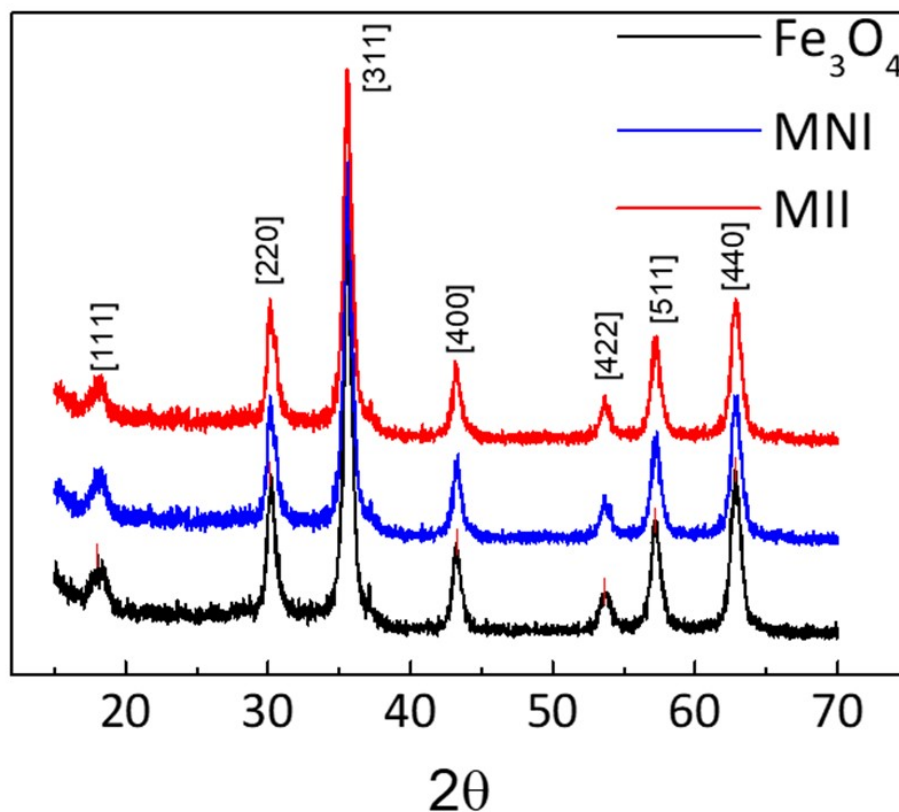

Fig.S1 DRX patterns for Fe<sub>3</sub>O<sub>4</sub>, MNI and MII solids.

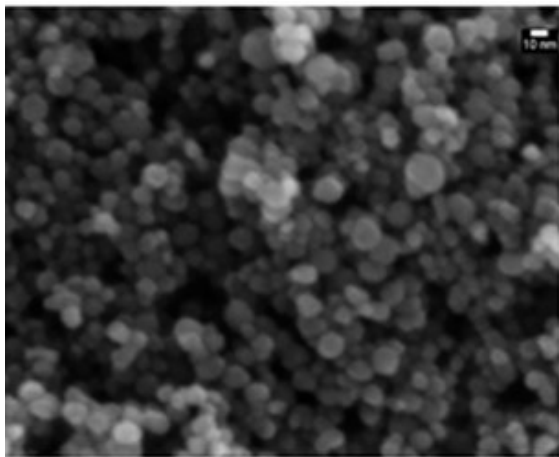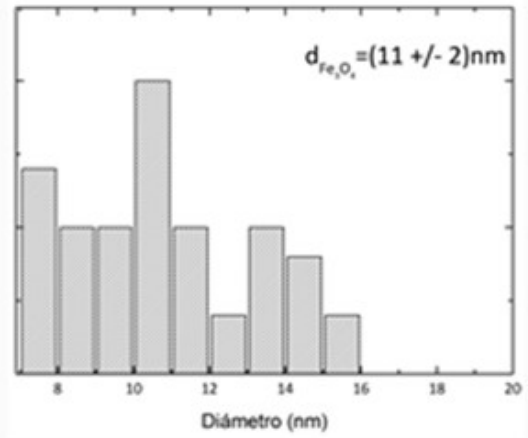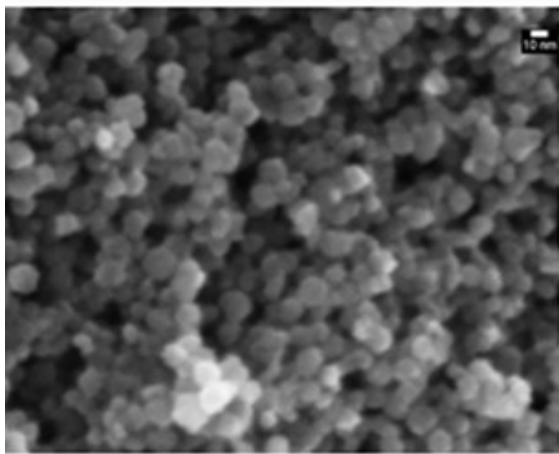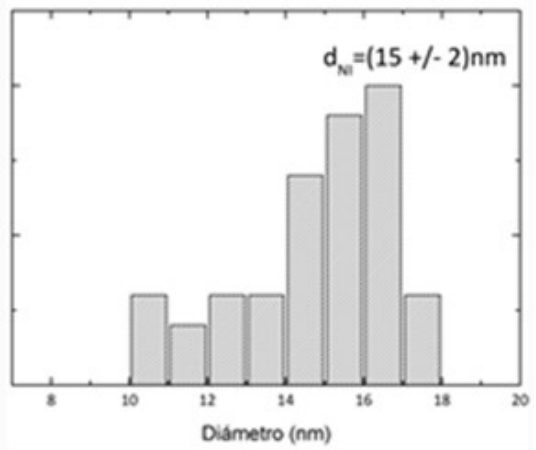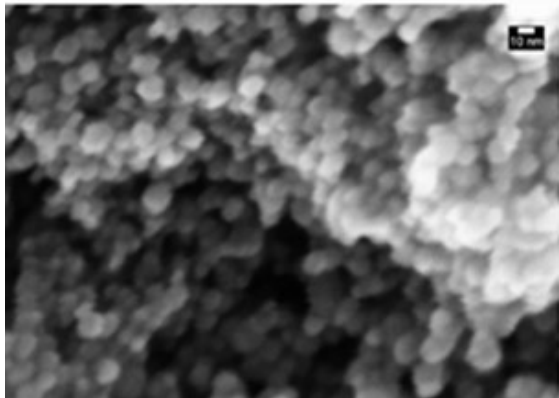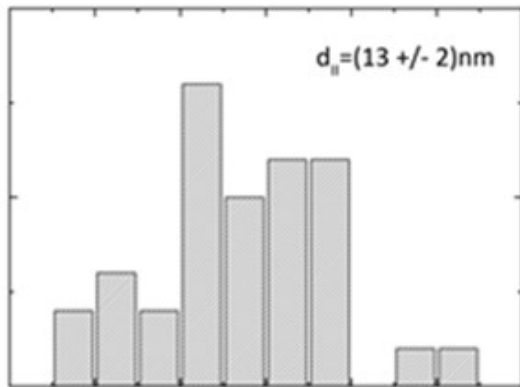

Fig.S2 SEM images and histograms. From the top:  $Fe_3O_4$ , MNI and MNI.

Fig. S3 (A), (B), (C) and (D) clearly show how the proximity of the particles to the magnet leads to an uneven adhesion of the particles. In contrast, as can be seen in Fig. S3 (E), by placing the container (MC) in the centre of the circular magnet, the distribution of the magnetic particles around its walls is completely homogeneous.

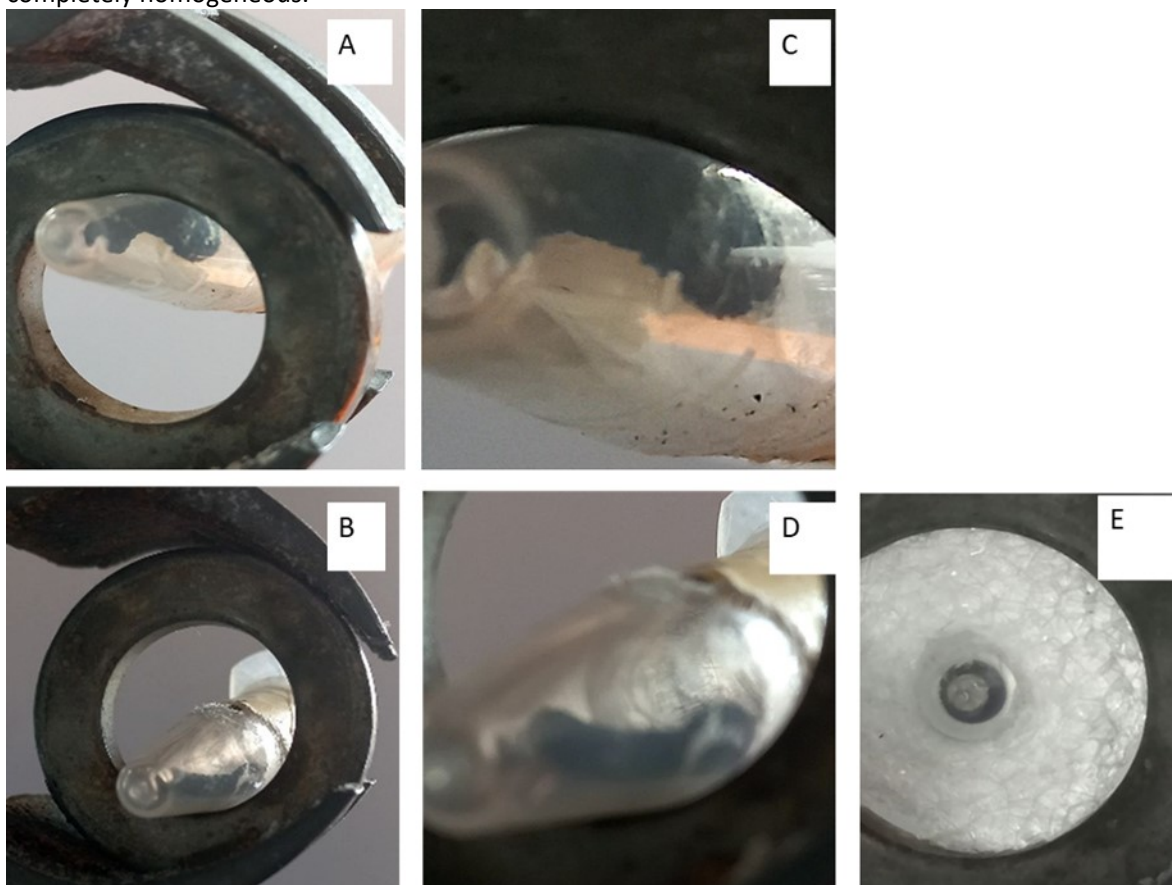

Fig.S3. Container with synthesised magnetic material attached to one wall of the circular magnet: (A) top and (B) bottom.(C) and (D) zoom of (A) and (B) respectively. (E)Zoom of the bottom of the container placed in the middle of the circular magnet.

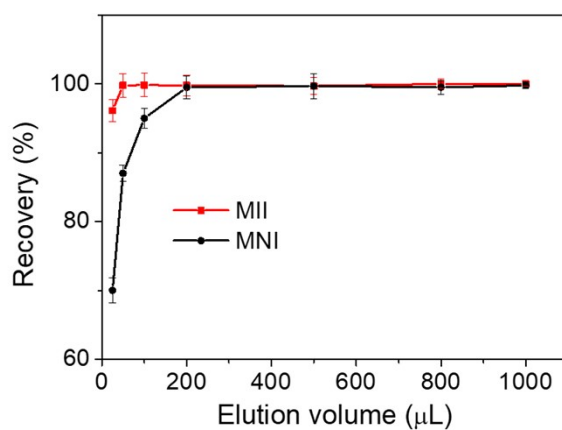

Fig. S4 Optimization of elution volume. [HCl]: 1 mol L<sup>-1</sup>, [Cd(II)]:0.02 ng mL<sup>-1</sup>, sample volume: 10 mL, adsorption flow rate: MNI: 1.5 mL min<sup>-1</sup>, MII: 2 mL min<sup>-1</sup>, and desorption flow rate: 0.5mL min<sup>-1</sup> for both.

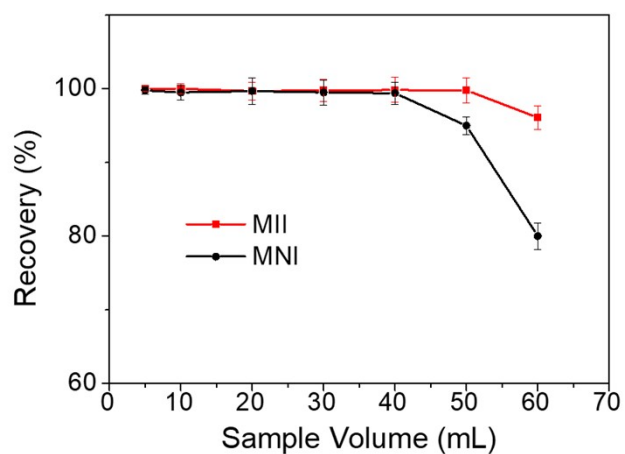

Fig. S5 Percentage recovery with sample volume under optimised conditions for MII and MNI (See 3.5).

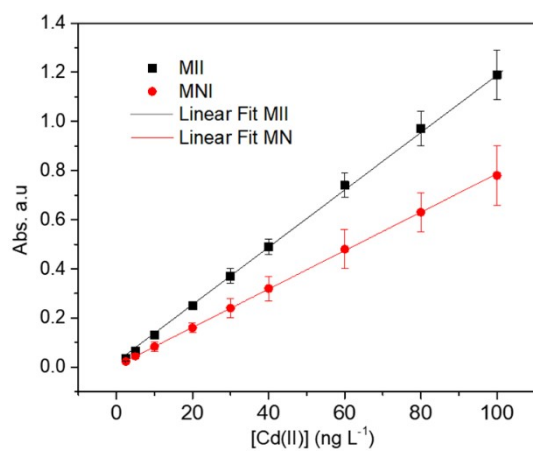

Fig. S6 Preconcentration curves for MII and MNI with the corresponding linear fit.

Note that, the last two point in the MII preconcentration curve were checked with 10 measures of a proper dilution.
